# Supplementary material for: Crystallographic and spectroscopic characterization of a mixed actinide–lanthanide carbide cluster stabilized inside anIh(7)-C80fullerene cage
Source: Royal Society of Chemistry journal article supplement (doi:10.1039/d0cc00133c), 2020-01-01
Supplement: d0cc00133c1.pdf [file d0cc00133c1.pdf]

# Crystallographic and spectroscopic characterization of a mixed actinide-lanthanide carbide cluster stabilized inside an $I_h(7)$ -C<sub>80</sub> fullerene cage

Xiaomeng Li,<sup>a†</sup> Yang-Rong Yao<sup>b†</sup>, Wei Yang<sup>a</sup>, Jiabin Zhuang<sup>a</sup>, Luis Echegoyen<sup>b</sup>, Ning Chen<sup>a\*</sup>

*Laboratory of Advanced Optoelectronic Materials, College of Chemistry, Chemical  
Engineering and Materials Science,  
Soochow University.*

*Suzhou, Jiangsu, 215123 (P. R. China).*

*Department of Chemistry,*

*University of Texas at El Paso.*

*500 W University Avenue, El Paso, Texas 79968 (United States)*

† These authors contributed equally to this work.

## Table of Contents

|                                                                                                                                 |          |
|---------------------------------------------------------------------------------------------------------------------------------|----------|
| <b>Experimental Details .....</b>                                                                                               | <b>2</b> |
| High-performance liquid chromatography (HPLC) separation process of Sc <sub>2</sub> UC@I <sub>h</sub> (7)-C <sub>80</sub> ..... | 2        |
| Spectroscopic and Electrochemical Studies. ....                                                                                 | 4        |
| X-ray Crystallographic Study.. ....                                                                                             | 4        |
| <b>References .....</b>                                                                                                         | <b>5</b> |

## Experimental Details

**Synthesis of  $\text{Sc}_2\text{UC}@I_h(7)\text{-C}_{80}$ .** A modified Krätschmer-Huffman DC arc-discharge method was applied for the synthesis of  $\text{Sc}_2\text{UC}@I_h(7)\text{-C}_{80}$ . In a typical process, 1.27 g of  $\text{U}_3\text{O}_8$  powder, 0.61 g of  $\text{Sc}_2\text{O}_3$  powder, and 1.62 g of graphite powder (molar ratio of U/Sc/C = 1:2:30) were packed in each drilled carbon rod. The filled rods were vaporized under a He atmosphere of 200 Torr and 1 Torr  $\text{NH}_3$ . Totally, 50 rods were vaporized and ca. 2.0 g crude fullerene extract was obtained (ca. 40 mg per rod), out of which ca. 0.5 mg  $\text{Sc}_2\text{UC}@I_h(7)\text{-C}_{80}$  was finally isolated. Besides  $\text{Sc}_2\text{UC}@I_h(7)\text{-C}_{80}$ , uranium-based EMFs  $\text{U}@C_{2n}$  and  $\text{Sc}_3\text{N}@C_{2n}$  are also formed along with empty fullerenes during the arcing process.

**High-performance liquid chromatography (HPLC) separation process of  $\text{Sc}_2\text{UC}@I_h(7)\text{-C}_{80}$ .** The first stage was performed on a Buckyprep-M column (25 mm × 250 mm, Cosmosil Nacalai Tesque) with toluene as mobile phase. After that, as shown in Figure S1, fraction from 37 to 42 min (marked in red) was re-injected into a Buckyprep column (10 mm × 250 mm, Cosmosil Nacalai Tesque) for the second stage separation using toluene as the eluent. The fraction marked in blue was collected. The third stage of separation was conducted on a Buckyprep-D column (10 mm × 250 mm, Cosmosil Nacalai Tesque) using toluene as the eluent. The fraction marked in green was collected. The final stage of separation was conducted on a Buckyprep column with toluene as mobile phase and pure  $\text{Sc}_2\text{UC}@I_h(7)\text{-C}_{80}$  was got. The purity of the isolated  $\text{Sc}_2\text{UC}@I_h(7)\text{-C}_{80}$  was then re-confirmed by chromatography on a Buckyprep column (10 mm × 250 mm, Cosmosil Nacalai Tesque) with toluene at a flow rate of 4.0 mL/min, along with the MALDI-TOF mass spectrometry in a positively charged mode (Figure 1).

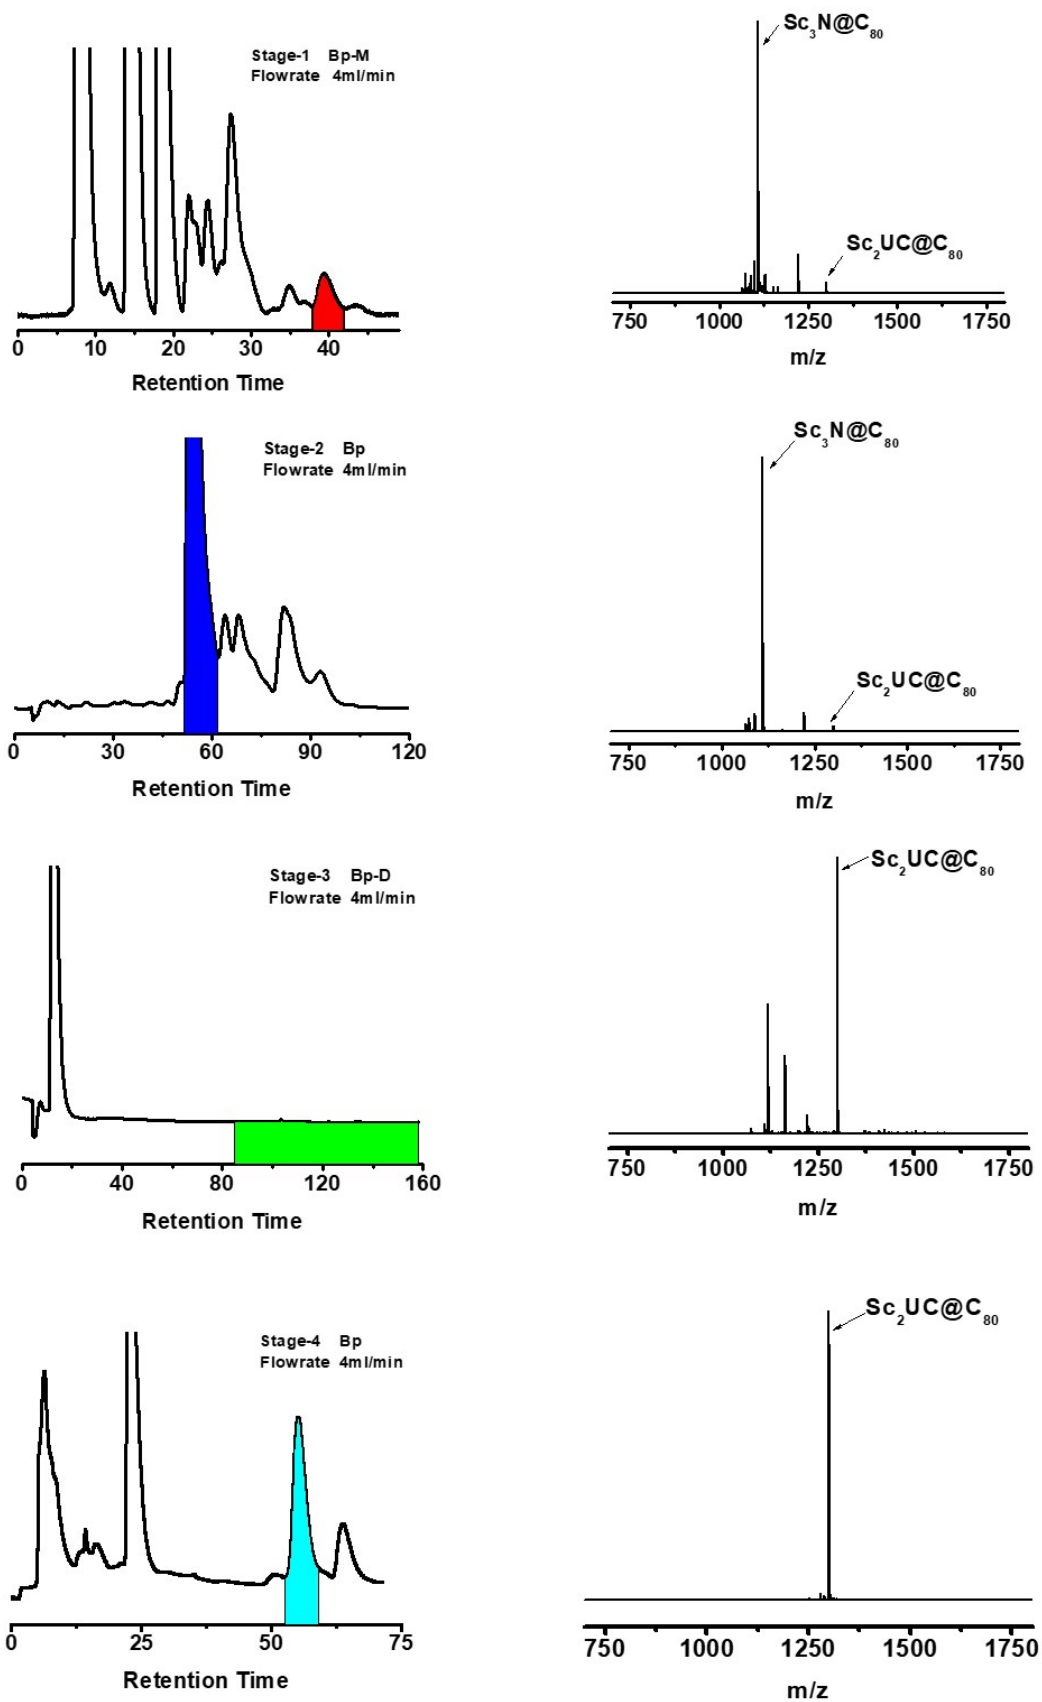

**Figure S1.** HPLC profiles showing the separation procedures of Sc<sub>2</sub>UC@I<sub>h</sub>(7)-C<sub>80</sub> (left) and the corresponding MALDI-TOF mass spectra (right).

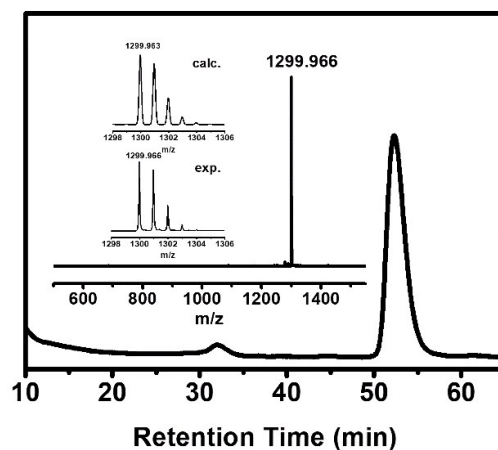

**Figure S2.** HPLC chromatogram of purified  $\text{Sc}_2\text{UC}@I_h(7)\text{-C}_{80}$  on a Buckyprep column with toluene as the eluent. (HPLC condition:  $\lambda = 310$  nm, flow rate: 4 mL/min. The insets show the positive-ion mode MALDI-TOF mass spectra and expansions of the corresponding experimental isotopic distributions of  $\text{Sc}_2\text{UC}@I_h(7)\text{-C}_{80}$  in comparison with the theoretical ones.).

**Spectroscopic and Electrochemical Studies.** The positive-ion mode matrix-assisted laser desorption/ionization time-of-flight (Bruker, Germany) was employed for the mass characterization. The UV-vis-NIR spectra of the purified  $\text{Sc}_2\text{UC}@I_h(7)\text{-C}_{80}$  were measured in  $\text{CS}_2$  solution with a Cary 5000 UV-vis-NIR spectrophotometer (Agilent, USA). The Raman spectra were obtained using a Horiba Lab RAM HR Evolution Raman spectrometer using a laser at 633 nm. The Micro Fourier transform infrared spectra were recorded at room temperature by a Vertex 70 spectrometer (Bruker, Germany) with a resolution of  $4\text{ cm}^{-1}$ . For the IR and Raman measurements, the samples were drop-coated on aluminized paper and a quartz plate, respectively. The residual  $\text{CS}_2$  was removed in a drying chamber in vacuum at  $40^\circ\text{C}$ . Cyclic voltammetry (CV) was obtained in *o*-dichlorobenzene using a CHI-660E instrument. A conventional three-electrode cell consisting of a platinum counter-electrode, a glassy carbon working electrode, and a silver reference electrode was used for the measurement.  $(n\text{-Bu})_4\text{NPF}_6$  (0.05 M) was used as the supporting electrolyte. The CV was measured at a scan rate of 100 mV/s.

**X-ray Crystallographic Study.** The black block crystals of  $\text{Sc}_2\text{UC}@I_h(7)\text{-C}_{80}\cdot[\text{Ni}^{\text{II}}(\text{OEP})]$  were obtained by slow diffusion of a carbon disulfide solution of  $\text{Sc}_2\text{UC}@I_h(7)\text{-C}_{80}$  into a benzene solution of  $[\text{Ni}^{\text{II}}(\text{OEP})]$ . Single-crystal X-ray data of  $\text{Sc}_2\text{UC}@I_h(7)\text{-C}_{80}$  were collected using synchrotron radiation ( $0.77491\text{ \AA}$ ) with a MX300-HE CCD detector at beamline BL17B at Shanghai Synchrotron Radiation Facility (SSRF). The multi-scan method was used for absorption correction. The structures were solved using intrinsic phasing method and refined by the full-matrix method based on  $F^2$  using SHELXL-2018 software package within Olex2 software.<sup>[1, 2]</sup> All the non-hydrogen atoms were refined anisotropically and all the hydrogen atoms were generated by riding model. The crystallographic data for the structure reported in this paper have been deposited at the Cambridge Crystallographic Data Centre (CCDC) with the deposition number 1965581.

Crystal data for  $\text{Sc}_2\text{UC}@I_h(7)\text{-C}_{80}\cdot[\text{Ni}^{\text{II}}(\text{OEP})]\cdot 2\text{C}_6\text{H}_6$ :  $M_r = 2007.91$ ,  $0.15\text{ mm} \times 0.12\text{ mm} \times 0.1\text{ mm}$ , monoclinic,  $C2/c$  (No. 15),  $a = 25.2486(5)\text{ \AA}$ ,  $b = 15.0232(3)\text{ \AA}$ ,  $c = 39.5120(8)\text{ \AA}$ ,  $\alpha = 90^\circ$ ,  $\beta = 95.3650(10)^\circ$ ,  $\gamma = 90^\circ$ ,  $V = 14921.8(5)\text{ \AA}^3$ ,  $Z = 8$ ,  $\rho_{\text{calcd}} = 1.788\text{ g} \cdot \text{cm}^{-3}$ ,  $\mu = 1.549\text{ mm}^{-1}$ ,  $\theta = 1.722 - 28.573$ ,  $T = 273(2)\text{ K}$ ,  $R_1/wR_2 = 0.0828/0.1994$  for all data;  $R_1/wR_2 = 0.0724/0.1897$  for 14620 reflections ( $I \geq 2\sigma(I)$ ) with 1327 parameters, Goodness-of-fit indicator = 1.038, Maximum residual electron density =  $1.314\text{ e} \cdot \text{\AA}^{-3}$ .

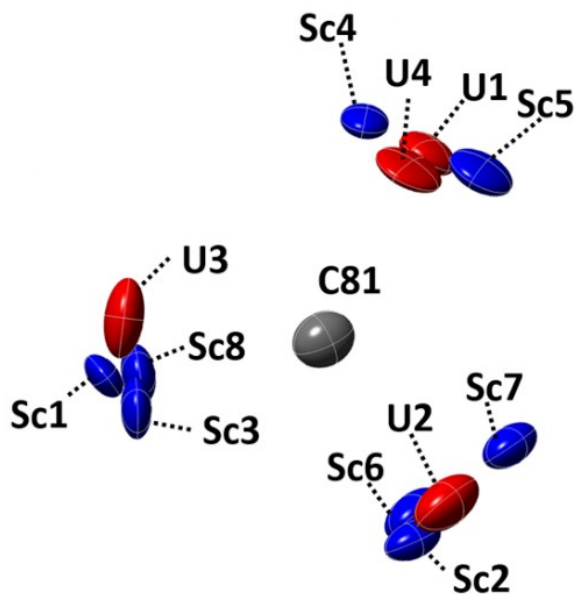

**Figure S3.** The perspective drawing showing the disorder of U and Sc in the  $\text{Sc}_2\text{UC}$  cluster.

**Table S1.** Occupancy of disordered U and Sc sites.

| Atoms     | U1, Sc1, Sc2 | U2, Sc3, Sc4 | U3, Sc5, Sc6 | U4, Sc7, Sc8 |
|-----------|--------------|--------------|--------------|--------------|
| Occupancy | 0.588(2)     | 0.1419(15),  | 0.1102(14)   | 0.0368(12)   |

**Table S2.** Bond lengths and bond angles of the  $\text{Sc}_2\text{UC}$  cluster in the major orientation.

|            | U1-C81     | Sc1-C81    | Sc2-C81     |
|------------|------------|------------|-------------|
| Length (Å) | 2.011(5)   | 2.053(6)   | 2.060(6)    |
|            | U1-C81-Sc1 | U1-C81-Sc2 | Sc1-C81-Sc2 |
| Angle (°)  | 127.4(3)   | 127.5(3)   | 105.0(3)    |

## References

- [1] Sheldrick, G.M. *Acta Cryst. C* 2015, **71**, 3-8.  
 [2] Dolomanov, O.V., Bourhis, L.J., Gildea, R.J., Howard, J.A.K. & Puschmann, H. *J. Appl. Cryst.* 2009, **42**, 339-341.
